# Supplementary material for: Incarceration status and cancer mortality: A population-based study
Source: PubMed Central journal article supplement (PMC9481043; doi:10.1371/journal.pone.0274703), 2022-09-16
Supplement: pone.0274703.s001.pdf [file pone.0274703.s001.pdf]

## Appendix 1: List of cancer ICD codes and grouping by organ system

| <b>ICD code</b>                 | <b>Site Group</b>              | <b>Cancer Group</b> |
|---------------------------------|--------------------------------|---------------------|
| C000-C009                       | Lip                            | Head and Neck       |
| C019-C029                       | Tongue                         | Head and Neck       |
| C079-C089                       | Salivary Gland                 | Head and Neck       |
| C040-C049                       | Floor of Mouth                 | Head and Neck       |
| C030-C039, C050-C059, C060-C069 | Gum and Other Mouth            | Head and Neck       |
| C110-C119                       | Nasopharynx                    | Head and Neck       |
| C090-C099                       | Tonsil                         | Head and Neck       |
| C100-C109                       | Oropharynx                     | Head and Neck       |
| C129, C130-C139                 | Hypopharynx                    | Head and Neck       |
| C140, C142, C148                | Other Oral Cavity and Pharynx  | Head and Neck       |
| C150-C159                       | Esophagus                      | Gastrointestinal    |
| C160-C169                       | Stomach                        | Gastrointestinal    |
| C170-C179                       | Small Intestine                | Gastrointestinal    |
| C180                            | Cecum                          | Gastrointestinal    |
| C181                            | Appendix                       | Gastrointestinal    |
| C182                            | Ascending Colon                | Gastrointestinal    |
| C183                            | Hepatic Flexure                | Gastrointestinal    |
| C184                            | Transverse Colon               | Gastrointestinal    |
| C185                            | Splenic Flexure                | Gastrointestinal    |
| C186                            | Descending Colon               | Gastrointestinal    |
| C187                            | Sigmoid Colon                  | Gastrointestinal    |
| C188-C189, C260                 | Large Intestine, NOS           | Gastrointestinal    |
| C199                            | Rectosigmoid Junction          | Gastrointestinal    |
| C209                            | Rectum                         | Gastrointestinal    |
| C210-C212, C218                 | Anus, Anal Canal and Anorectum | Gastrointestinal    |

|                                         |                                                   |                                  |
|-----------------------------------------|---------------------------------------------------|----------------------------------|
| C220                                    | Liver                                             | Gastrointestinal                 |
| C221                                    | Intrahepatic Bile Duct                            | Gastrointestinal                 |
| C239                                    | Gallbladder                                       | Gastrointestinal                 |
| C240-C249                               | Other Biliary                                     | Gastrointestinal                 |
| C250-C259                               | Pancreas                                          | Gastrointestinal                 |
| C480                                    | Retroperitoneum                                   | Gastrointestinal                 |
| C481-C482                               | Peritoneum, Omentum and Mesentery                 | Gastrointestinal                 |
| C268-C269, C488                         | Other Digestive Organs                            | Gastrointestinal                 |
| C300-C301, C310-C319                    | Nose, Nasal Cavity and Middle Ear                 | Head and Neck                    |
| C320-C329                               | Larynx                                            | Head and Neck                    |
| C340-C349                               | Lung and Bronchus                                 | Thoracic                         |
| C384                                    | Pleura                                            | Thoracic                         |
| C339, C381-C383, C388, C390, C398, C399 | Trachea, Mediastinum and Other Respiratory Organs | Thoracic                         |
| C400-C419                               | Bones and Joints                                  | Sarcoma                          |
| C380, C470-C479, C490-C499              | Soft Tissue including Heart                       | Sarcoma                          |
| C440-C449                               | Melanoma of the Skin                              | Skin                             |
| C440-C449                               | Other Non-Epithelial Skin                         | Skin                             |
| C500-C509                               | Breast                                            | Breast                           |
| C530-C539                               | Cervix Uteri                                      | Female Reproductive (gynecology) |
| C540-C549                               | Corpus Uteri                                      | Female Reproductive (gynecology) |
| C559                                    | Uterus, NOS                                       | Female Reproductive (gynecology) |
| C569                                    | Ovary                                             | Female Reproductive (gynecology) |
| C529                                    | Vagina                                            | Female Reproductive (gynecology) |
| C510-C519                               | Vulva                                             | Female Reproductive (gynecology) |
| C570-C579, C589                         | Other Female Genital Organs                       | Female Reproductive (gynecology) |
| C619                                    | Prostate                                          | Male Reproductive                |
| C620-C629                               | Testis                                            | Male Reproductive                |
| C600-C609                               | Penis                                             | Male Reproductive                |

|                                                                     |                                     |                              |
|---------------------------------------------------------------------|-------------------------------------|------------------------------|
| C630-C639                                                           | Other Male Genital Organs           | Male Reproductive            |
| C670-C679                                                           | Urinary Bladder                     | Urinary (non-reproductive)   |
| C649, C659                                                          | Kidney and Renal Pelvis             | Urinary (non-reproductive)   |
| C669                                                                | Ureter                              | Urinary (non-reproductive)   |
| C680-C689                                                           | Other Urinary Organs                | Urinary (non-reproductive)   |
| C690-C699                                                           | Eye and Orbit                       | Central Nervous System (CNS) |
| C710-C719                                                           | Brain                               | Central Nervous System (CNS) |
| C710-C719                                                           | Cranial Nerves Other Nervous System | Central Nervous System (CNS) |
| C739                                                                | Thyroid                             | Head and Neck                |
| C379, C740-C749, C750-C759                                          | Other Endocrine including Thymus    | Head and Neck                |
| C024, C098-C099, C111, C142, C379, C422, C770-C779                  | Hodgkin - Nodal                     | Leukemia & Lymphoma          |
| All other sites                                                     | Hodgkin - Extranodal                | Leukemia & Lymphoma          |
| C024, C098, C099, C111, C142, C379, C422, C770-C779                 | NHL - Nodal                         | Leukemia & Lymphoma          |
| All sites except C024, C098-C099, C111, C142, C379, C422, C770-C779 | NHL - Extranodal                    | Leukemia & Lymphoma          |
|                                                                     | Myeloma                             | Leukemia & Lymphoma          |
|                                                                     | Acute Lymphocytic Leukemia          | Leukemia & Lymphoma          |
| C420, C421, C424                                                    | Chronic Lymphocytic Leukemia        | Leukemia & Lymphoma          |
|                                                                     | Other Lymphocytic Leukemia          | Leukemia & Lymphoma          |
|                                                                     | Acute Myeloid Leukemia              | Leukemia & Lymphoma          |
|                                                                     | Chronic Myeloid Leukemia            | Leukemia & Lymphoma          |
|                                                                     | Other Myeloid/Monocytic Leukemia    | Leukemia & Lymphoma          |
|                                                                     | Acute Monocytic Leukemia            | Leukemia & Lymphoma          |
|                                                                     | Other Acute Leukemia                | Leukemia & Lymphoma          |
|                                                                     | Aleukemic, subleukemic and NOS      | Leukemia & Lymphoma          |
|                                                                     | Mesothelioma                        | Thoracic                     |
|                                                                     | Kaposi Sarcoma                      | Sarcoma                      |
|                                                                     | Miscellaneous                       | Other                        |
