# Supplementary material for: Incarceration status and cancer mortality: A population-based study
Source: PubMed Central journal article supplement (PMC9481043; doi:10.1371/journal.pone.0274703), 2022-09-16
Supplement: pone.0274703.s002.pdf [file pone.0274703.s002.pdf]

**S2 Table: Length of incarceration and average time to cancer diagnosis**

|                                                                      | Status at cancer diagnosis |       |                               |       | p-value |
|----------------------------------------------------------------------|----------------------------|-------|-------------------------------|-------|---------|
|                                                                      | Incarcerated<br>(N=239)    |       | Post-incarceration<br>(N=479) |       |         |
|                                                                      | mean                       | SD    | mean                          | SD    |         |
| <b>Length of incarceration for the target DOC episode (in years)</b> | 4.63                       | 6.14  | 1.05                          | 1.08  | p<0.000 |
| <b>Time between release and diagnosis (in months)</b>                |                            |       | 5.06                          | 3.47  |         |
| <b>Time between incarceration and diagnosis (in years)</b>           | 3.63                       | 5.67  |                               |       |         |
| <b>Age at first incarceration</b>                                    | 31.35                      | 15.30 | 33.38                         | 13.87 | p=0.074 |
| <b>Lifetime incarceration before target DOC episode, ( in years)</b> | 10.21                      | 8.98  | 4.8                           | 6.64  | p<0.000 |
| <b>Proportion of life involved with DOC</b>                          | 0.41                       | 0.22  | 0.38                          | 0.21  | p=0.104 |
